# Supplementary material for: Calibration of57Fe Mössbauer constants by first principles
Source: Royal Society of Chemistry journal article supplement (doi:10.1039/c5cp07882b), 2016-01-01
Supplement: c5cp07882b1.pdf [file c5cp07882b1.pdf]

## Supplemental material information. Calibration of $^{57}\text{Fe}$ Mössbauer constants by first principles..

Silvia Casassa,<sup>\*a</sup> and Anna Maria Ferrari<sup>a</sup>

|                                | $Q_{\text{net}}$ |       |       | Volume |       |       |
|--------------------------------|------------------|-------|-------|--------|-------|-------|
|                                | PBE              | PBE0  | HF    | PBE    | PBE0  | HF    |
| FeF <sub>2</sub>               | 1.54             | 1.63  | 1.77  | 66.9   | 65.1  | 64.4  |
| FeCl <sub>2</sub>              | 1.21             | 1.34  | 1.55  | 74.2   | 71.0  | 65.1  |
| FeBr <sub>2</sub>              | 1.06             | 1.22  | 1.47  | 85.5   | 81.1  | 73.4  |
| FeI <sub>2</sub>               | 0.76             | 0.96  | 1.29  | 96.1   | 89.8  | 79.2  |
| FeO                            | 1.34             | 1.44  | 1.62  | 62.4   | 60.3  | 56.1  |
| FeF <sub>3</sub>               | 2.03             | 2.23  | 2.57  | 49.4   | 47.0  | 42.9  |
| FeCl <sub>3</sub>              | 1.42             | 1.65  | 2.18  | 65.7   | 61.8  | 53.3  |
| Fe <sub>2</sub> O <sub>3</sub> | 1.58             | 1.96  | 2.37  | 56.4   | 50.8  | 45.1  |
| FeAl                           | -1.26            | -1.45 | -1.90 | 110.6  | 115.1 | 127.8 |
| Fe                             | 0.00             | 0.00  | 0.0   | 76.3   | 76.3  | 76.4  |
| FeTi                           | -0.83            | -1.04 | -1.33 | 100.1  | 103.1 | 107.3 |

**Table S.I** Net charges,  $Q_{\text{net}}$ , and volume, in a.u., refer to  $^{57}\text{Fe}$  in different crystalline compounds, as evaluated by Bader topological analysis of the electron density. For sake of comparison, the primitive cell of Iron is 76.6 a.u..

|                                | $\rho_e^A - \rho_e^S$ (a.u.) |        |        |        |        |        |        |        | $\delta$ (mm/s)      |
|--------------------------------|------------------------------|--------|--------|--------|--------|--------|--------|--------|----------------------|
|                                | PBE                          | PWGGA  | M06L   | B3LYP  | PBE0   | M06    | M062X  | HF     | exp                  |
| FeF <sub>2</sub>               | -3.514                       | -3.506 | -3.528 | -3.614 | -3.761 | -3.445 | -3.874 | -5.474 | 1.467 <sup>1,2</sup> |
| FeCl <sub>2</sub>              | -2.847                       | -2.836 | -2.938 | -2.951 | -3.074 | -2.756 | -3.280 | -4.809 | 1.30 <sup>2,3</sup>  |
| FeBr <sub>2</sub>              | -2.801                       | -2.787 | -2.945 | -2.839 | -2.988 | -2.643 | -3.202 | -4.745 | 1.120 <sup>4</sup>   |
| FeO                            | -2.794                       | -2.794 | -2.712 | -2.789 | -2.832 | -2.516 | -3.235 | -4.515 | 1.15 <sup>5</sup>    |
| FeI <sub>2</sub>               | -2.646                       | -2.639 | -2.672 | -2.684 | -2.844 | -2.412 | -3.121 | -4.542 | 1.044 <sup>4</sup>   |
| FeF <sub>3</sub>               | -1.870                       | -1.866 | -1.632 | -1.602 | -1.623 | -1.419 | -1.605 | -2.666 | 0.489 <sup>6</sup>   |
| FeCl <sub>3</sub>              | -1.728                       | -1.727 | -1.595 | -1.415 | -1.381 | -1.085 | -1.284 | -1.942 | 0.45 <sup>7</sup>    |
| Fe <sub>2</sub> O <sub>3</sub> | -1.592                       | -1.603 | -1.285 | -1.157 | -1.150 | -0.912 | -1.149 | -2.027 | 0.37 <sup>8</sup>    |
| AlFe                           | -1.077                       | -1.074 | -0.992 | -0.825 | -0.882 | -1.156 | -0.571 | -0.698 | 0.25 <sup>9</sup>    |
| TiFe                           | 0.503                        | 0.507  | 0.554  | 0.729  | 0.929  | 0.288  | 1.040  | 0.177  | -0.145 <sup>10</sup> |

**Table S.II** Absolute values of the electron density on  $^{57}\text{Fe}$ ,  $\rho^A(\mathbf{r})$ , for compounds in the calibration set, can be inferred referring to the value of  $\rho^S(\mathbf{r}) \equiv \rho^{Fe}(\mathbf{r})$  reported in Table II of the manuscript.

|                                | $V_{ZZ}$ ( $10^{21}\text{V}/\text{m}^2$ ) |             |       |       |                    | $\Delta E_Q$ (mm/s) |
|--------------------------------|-------------------------------------------|-------------|-------|-------|--------------------|---------------------|
|                                | PBE                                       | CP(PPP)/PBE | PWGGA | M06L  | Exp                | Exp                 |
| FeF <sub>2</sub>               | 17.37                                     | 17.72       | 17.54 | 16.62 | 17.1 <sup>11</sup> | 2.85 <sup>6</sup>   |
| FeCl <sub>2</sub>              | 1.50                                      | 1.86        | 1.86  | 2.05  | 6.01 <sup>12</sup> | 1.210 <sup>4</sup>  |
| FeBr <sub>2</sub>              | 0.89                                      | 0.99        | 0.85  | 1.09  | 6.61 <sup>13</sup> | 1.132 <sup>4</sup>  |
| FeI <sub>2</sub>               | 0.63                                      | 0.87        | 0.65  | 1.62  | 0.1                | 0.962 <sup>4</sup>  |
| Fe <sub>2</sub> O <sub>3</sub> | 1.64                                      | 1.75        | 2.04  | 1.51  | 2.16 <sup>14</sup> | 0.12 <sup>15</sup>  |
| FeCl <sub>3</sub>              | -0.38                                     | -0.34       | -0.36 | -0.30 |                    | 0.04 <sup>4</sup>   |
| FeF <sub>3</sub>               | 0.34                                      | 0.44        | 0.32  | 0.58  |                    | 0.044 <sup>6</sup>  |

**Table S.III**  $V_{ZZ}$  component of the electric field gradient at the  $^{57}\text{Fe}$  nucleus. CP(PPP) basis set by Neese and coworkers.<sup>16</sup> Experimental EFG and quadrupolar splittings are reported in the sixth and last column, respectively.<sup>17</sup>

<sup>a</sup> Dipartimento di Chimica and Centre of Excellence NIS (Nanostructured Interfaces and Surfaces), Università degli Studi di Torino, via P. Giuria 5, I-10125 Torino, Italy.  
E-mail: silvia.casassa@unito.it

## References

- 1 M. Filatov, *J. Chem. Phys.*, 2007, **127**, 084101.
- 2 L. Walker, G. Wertheim and V. Jaccarino, *Phys. Rev. Lett.*, 1961, **6**, 98.
- 3 R. Axtmann, Y. Hazony and J. H. Jr., *Chem. Phys. Lett.*, 1968, **2**, 673.
- 4 E. Pfletschinger and D. Buchanan, *Z. Phys.*, 1968, **209**, 119.
- 5 G. Shirane, D. E. Cox and S. Ruby, *Phys. Rev.*, 1962, **4**, 1158.
- 6 G. Wertheim, H. Guggenheim and D. Buchanan, *Phys. Rev.*, 1968, **169**, 465.
- 7 S. DeBenedetti, G. Lang and R. Ingalls, *Phys. Rev. Lett.*, 1961, **6**, 60.
- 8 M. Dyar, D. Agresti, M. Schaefer, C. Grant and E. Sklute, *Ann. Rev. Earth Planet Sci.*, 2006, **34**, 83.
- 9 C. Jeandey and P. Peretto, *J. Physique*, 1975, **36**, 1103.
- 10 E. Mielczarek and W. Winfree, *Phys. Rev. B*, 1975, **11**, 1026.
- 11 G. Wertheim and D. Buchanan, *Phys. Rev.*, 1967, **161**, 478.
- 12 D. Simkin, *Phys. Rev.*, 1969, **177**, 1008.
- 13 G. Bancroft and J. Dubery, *J. Chem. Phys.*, 1969, **50**, 2264.
- 14 R. Vaughan and H. Drickamer, *J. Chem. Phys.*, 1967, **47**, 1530.
- 15 O. Kistner and A. Sunyar, *Phys. Rev. Lett.*, 1960, **4**, 412.
- 16 M. Römelt, S. Ye and F. Neese, *Inor. Chem.*, 2009, **48**, 784–785.
- 17 H. Fjellvag, B. C. Hauback, T. Vogt and S. Stolen, *American Mineralogist*, 2002, **87**, 347–349.
